# Supplementary material for: Cyanide-bridged NiCr and alternate NiFe–NiCr magnetic ultrathin films on functionalized Si(100) surface
Source: Royal Society of Chemistry journal article supplement (doi:10.1039/c2dt11943a), 2012-01-01

Electronic Supporting Information

**Cyanide-bridged NiCr and alternate NiFe/NiCr magnetic ultra thin films on functionalized Si(100) surface**

Simon Tricard,<sup>a,\*</sup> Claire Costa-Coquelard,<sup>a</sup> Sandra Mazerat,<sup>a</sup> Eric Rivière,<sup>a</sup> Vincent Huc,<sup>a</sup>  
Christophe David,<sup>b</sup> Frédéric Miserque,<sup>c</sup> Pascale Jegou,<sup>d</sup> Serge Palacin<sup>d</sup> and Talal Mallah<sup>a,\*</sup>

**Fig. S1** Infrared spectra centered on the cyanide band of the precursor  $K_3[Cr(CN)_6]$  ( $2129\text{ cm}^{-1}$ ) and the bulk material  $Ni_3[Cr(CN)_6]_2$  ( $2172\text{ cm}^{-1}$ ).

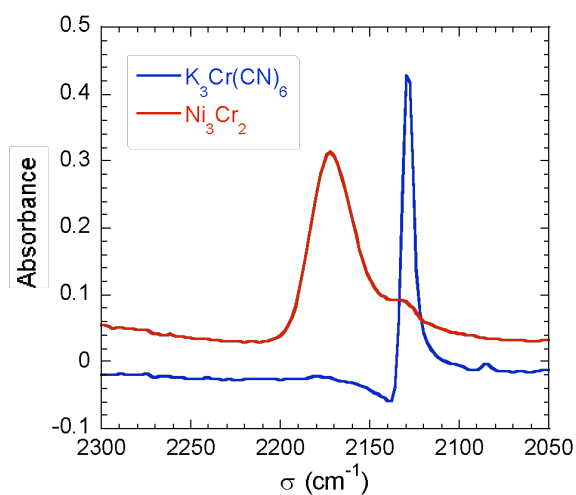

**Fig. S2** XPS spectra at the Cr2p, Ni2p and Fe2p edges for a) the reference  $\text{Ni}_3[\text{Cr}(\text{CN})_6]_2$  bulk compound, b) at the step *Ni6* of NiCr SGS, c) at the step *Ni6* of NiCr on NiFe SGS (sample **G1**), d) at the step *Ni12* of alternated two cycles NiFe and two cycles NiCr growth (sample **G2**), e) at the step *Ni6* of alternated one cycle NiFe and one cycle NiCr growth (sample **G3**), f) table with the energy values.

a)

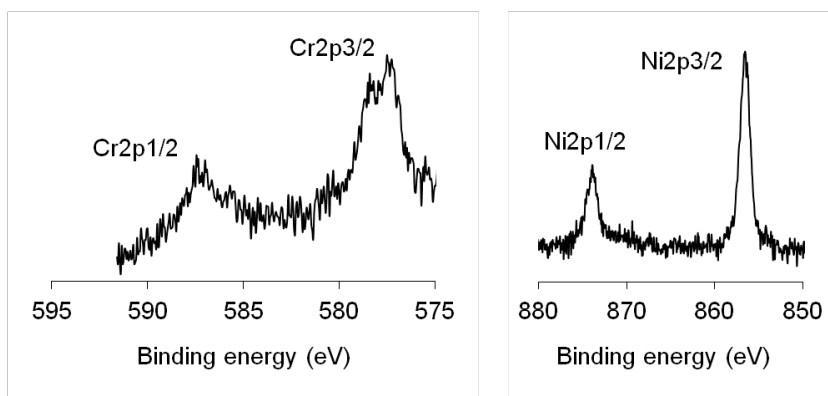

b)

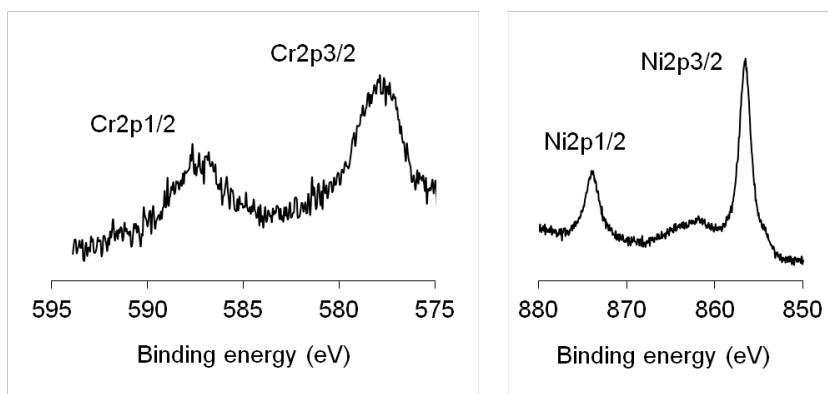

c)

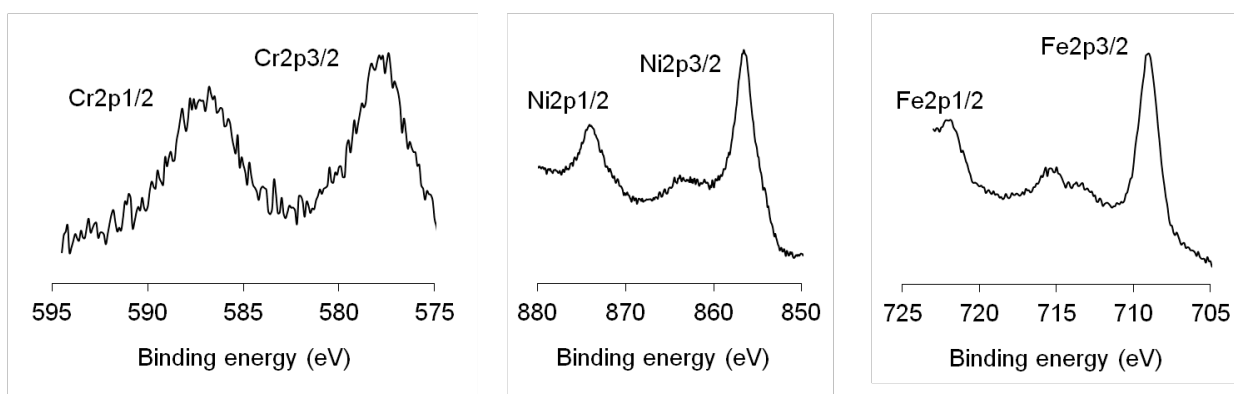

d)

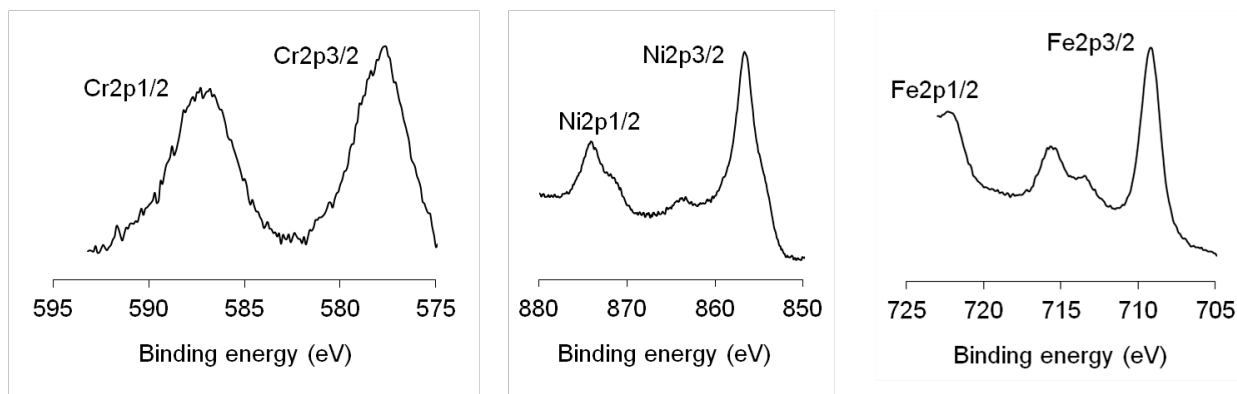

e)

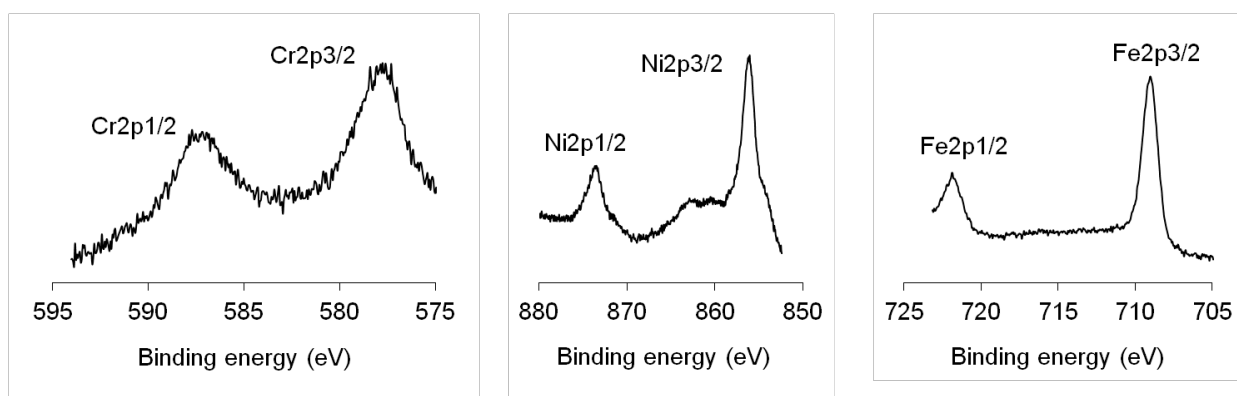

f)

| Energies (eV)                        | Cr2p <sub>1/2</sub> | Cr2p <sub>3/2</sub> | Ni2p <sub>1/2</sub> | Ni2p <sub>3/2</sub> | Fe2p <sub>1/2</sub> | Fe2p <sub>3/2</sub> |
|--------------------------------------|---------------------|---------------------|---------------------|---------------------|---------------------|---------------------|
| Bulk Ni <sub>3</sub> Cr <sub>2</sub> | 587.3               | 577.9               | 873.6               | 856.5               | -                   | -                   |
| Ni-Cr                                | 587.3               | 577.8               | 873.8               | 856.4               | -                   | -                   |
| Ni-Cr on Ni-Fe                       | 587.4               | 578.0               | 873.8               | 856.2               | 721.5               | 708.7               |
| Alternated two cycles                | 587.2               | 577.8               | 873.9               | 856.4               | 721.8               | 709.0               |
| Alternated one cycle                 | 587.2               | 577.9               | 874.0               | 856.3               | 721.7               | 708.9               |

**Fig. S3** Alternated one cycle NiFe and one cycle NiCr growth (6 cycles) – sample **G3**: a) Evolution of the infra-red spectra centered on the cyanide band from the step *Ni1* to the step *Ni6* – IR spectra and peak area at each step. b) Atomic Force Microscopy image and cross section represented by the blue line on the image at the step *Ni6*. c)  $M = f(T)$  curves at  $H = 500$  Oe at the step *Ni6* – plain circles: ZFC, open circles: FC.

a)

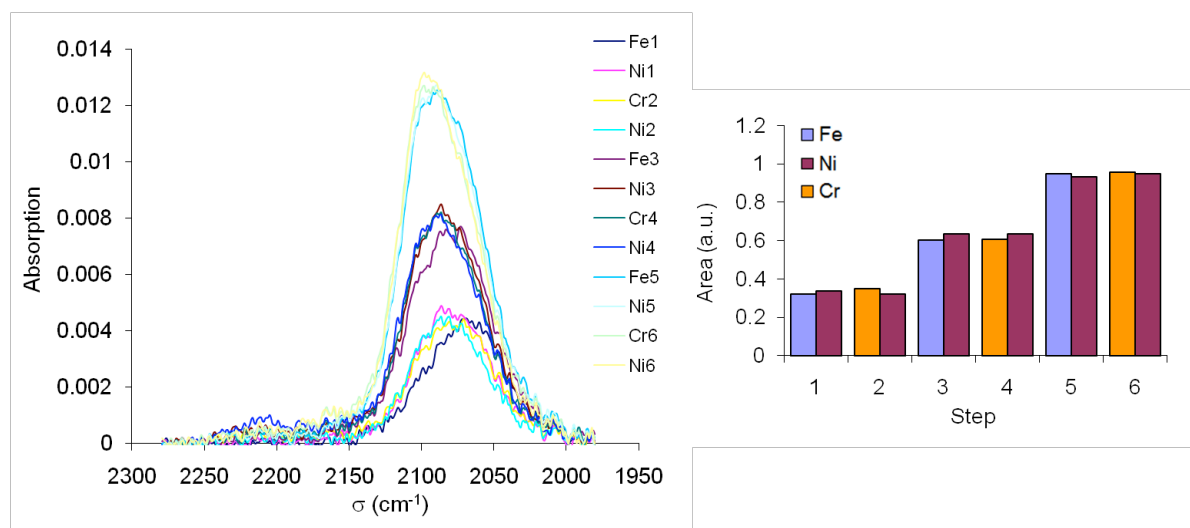

b)

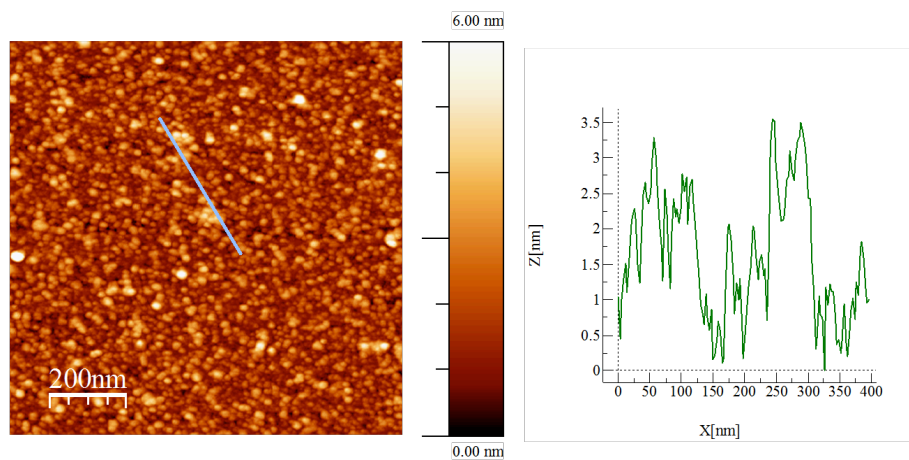

c)

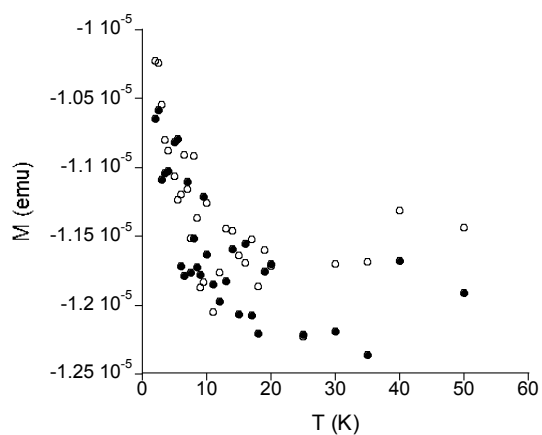

Supplement: c2dt11943a.pdf [file c2dt11943a.pdf]
